# Supplementary material for: Water-mediated network in the resistance mechanism of fosfomycin
Source: Royal Society of Chemistry journal article supplement (doi:10.1039/c8cp02860e), 2018-01-01
Supplement: c8cp02860e1.pdf [file c8cp02860e1.pdf]

## Water-Mediated Network in the Resistance Mechanism of Fosfomycin

James McClory,<sup>†</sup> Jun-Tang Lin<sup>‡</sup>, David Timson<sup>§</sup>, Jian Zhang<sup>//</sup> Meilan Huang<sup>†,\*</sup>

<sup>†</sup> School of Chemistry and Chemical Engineering, Queen's University Belfast, David Keir Building, Stranmillis Road, Belfast, BT9 5AG, Northern Ireland, United Kingdom

<sup>‡</sup> Stem Cells and Biotherapy Engineering Research Centre of Henan, College of Biomedical Engineering, Xinxiang Medical University, Xinxiang 453003, China

<sup>§</sup> School of Pharmacy and Biomolecular Sciences, The University of Brighton, Huxley Building, Lewes Road, Brighton, BN2 4GJ, United Kingdom

<sup>//</sup> Shanghai Jiaotong University, 280 Chongqing Road, Shanghai 200025, China

\*Corresponding Author: [m.huang@qub.ac.uk](mailto:m.huang@qub.ac.uk)

**Table S1.** RESP charges of atoms of Fosfomycin

| <b>No.</b> | <b>atom Name</b> | <b>atom Type</b> | <b>RESP Charge</b> |
|------------|------------------|------------------|--------------------|
| 1          | O1               | OS               | -0.39              |
| 2          | O2               | O2               | -0.87              |
| 3          | O3               | O2               | -0.87              |
| 4          | O4               | OH               | -0.49              |
| 5          | C1               | CT               | -0.18              |
| 6          | C2               | CT               | 0.14               |
| 7          | C3               | CT               | 0.02               |
| 8          | P1               | P                | 1.16               |
| 9          | H1               | H1               | 0.08               |
| 10         | H2               | H1               | -0.01              |
| 11         | H3               | HC               | 0.01               |
| 12         | H4               | HC               | 0.01               |
| 13         | H5               | HC               | 0.01               |
| 14         | H6               | HO               | 0.38               |

**Table S2.** QM/MM Benchmark calculations on FomA

|                  | <b>Reactant</b> | <b>TS</b> | <b>Product</b> |
|------------------|-----------------|-----------|----------------|
| 6-31g(d) Opt     | 0               | 17.31     | -14.13         |
| 6-31g(d,p) SP    | 0               | 17.64     | -14.48         |
| 6-31+g(d) SP     | 0               | 19.01     | -11.83         |
| 6-311++g(d,p) SP | 0               | 19.44     | -12.22         |

**Table S3.** Summary of key interactions in FomA from crystal, MD and QM/MM structures

|                                              | <b>Lys18-ATP</b>                      | <b>dLys18-<math>\alpha</math>-PO<sub>4</sub> (Å)</b> | <b>dLys18-<math>\beta</math>-<math>\gamma</math>-bridging oxygen (Å)</b> | <b>dHis58-<math>\gamma</math>-PO<sub>4</sub> (Å)</b> | <b>dHis58-Sub-PO<sub>4</sub> (Å)</b> | <b>Ser13-Water</b>                                        |
|----------------------------------------------|---------------------------------------|------------------------------------------------------|--------------------------------------------------------------------------|------------------------------------------------------|--------------------------------------|-----------------------------------------------------------|
| <b>Crystal FomA-FM (pdb: 3D41)</b>           | $\gamma$ -PO <sub>4</sub>             | 4.40                                                 | 5.35                                                                     | 3.45                                                 | 3.88                                 | $\beta$ -, $\gamma$ -bridging oxygen                      |
| <b>Representative structure (MD Cluster)</b> | $\alpha$ -, $\gamma$ -PO <sub>4</sub> | 3.82                                                 | 3.76                                                                     | 3.28                                                 | 2.74                                 | Four-Water mediated H-bond with three water tethering ATP |
| <b>Reactant (QM/MM)</b>                      | $\alpha$ -, $\gamma$ -PO <sub>4</sub> | 2.92                                                 | 3.84                                                                     | 3.28                                                 | 3.71                                 | Four-Water mediated H-bond with three water tethering ATP |
| <b>TS (QM/MM)</b>                            | $\alpha$ -, $\gamma$ -PO <sub>4</sub> | 2.87                                                 | 3.78                                                                     | 3.56                                                 | 2.70                                 | Four-Water mediated H-bond with three water tethering ATP |
| <b>Product (QM/MM)</b>                       | $\alpha$ -, $\gamma$ -PO <sub>4</sub> | 2.86                                                 | 3.58                                                                     | 3.15                                                 | 2.95                                 | Four-Water mediated H-bond with three water tethering ATP |
| <b>Crystal FomA-FM (pdb: 3QUO)</b>           | $\gamma$ -PO <sub>4</sub>             | 4.20                                                 | 4.75                                                                     | 3.64                                                 | 3.58                                 | $\beta$ -PO <sub>4</sub>                                  |

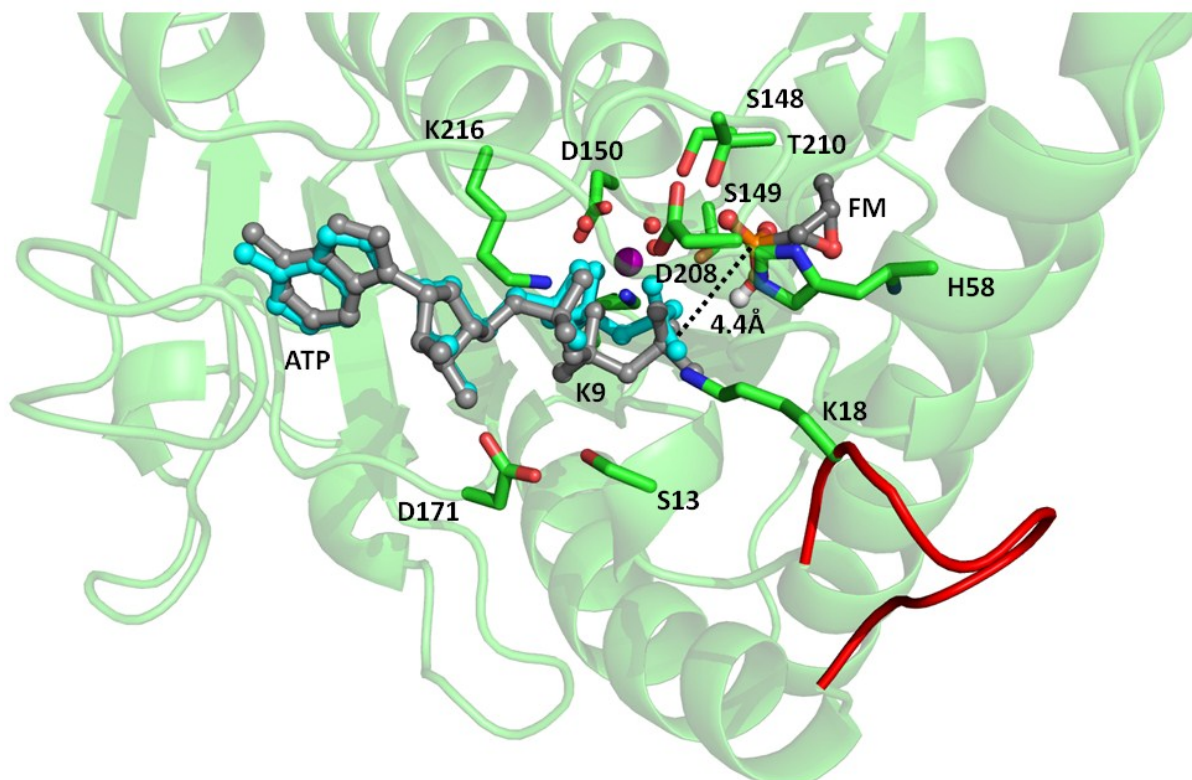

**Figure S1.** ATP in the built reactant model (grey) and representative cluster structure of ATP-FM-Mg<sup>2+</sup>-FomA complex (cyan) shows significant conformational change. The built reactant model is shown in green ribbon representation, with the flexible glycine loop shown in red.

```

                                K9 S13 K18
STW-FomA  MGSSHHHHHHSSGLVPRGSHMTPDFLAIKVGGSLSFSRKDEPGSLDDDAVTRFARNFARLA
THA-IPK   -----DPFTMMILKIGGSVITDKSAYRTARTYAIRSIVK-----
MEJ-IPK   -----GSHGGSMLTILKLGGSILSDKNVPYSIKWDLERIAMIEKNAL
           : :*:***::: * . : : :.

                                H58
STW-FomA  ETY-----RGRMVLISGGGAFGHGAIRDHDSTHAFS-LAGLTEATFEVKKRWAEK-----
THA-IPK   -V--LSGIEDLVCVVHGGGSFGHIKAMEFGLPGPK---NPRSSIGYSIVHRDMENLDLMV
MEJ-IPK   DYYKNQNKEIKLILVHGGGAFGHPVAKKYLKIEDGKKIFINMEKGFWEIQRAMRRFNNII
           . : : : ***:*** .. . : : * ..

STW-FomA  ---LRGIGVDAFPLQLAAMCTLRNGIPQLRSEVLRDVLHDHGALPVLAGDALFDEHGKLWA
THA-IPK   IDAMIEMGMRPISVPISAL-R--Y-DGRFDYTPLIRYIDAGFVPVSYGDVYIKDEHSYGI
MEJ-IPK   IDTLQSYDIPAVSIQPSFVWFGD-KLIFDTSAIKEMLKRNLVPIVHGDIVIDDKNGYRI
           : . : . : : : : : : : : : : ** ** : : .

                                D150 D171
STW-FomA  FSSDRVPEVLLPMVEGRLRVVTLTDVDGIIVTDGAGGDTILPEVDARS-PEQAYAALWGSS
THA-IPK   YSGDDIMADMAELLKPDV-AVFLTDVDGIYSKDPKR-NP---DAVLLRDIDTNIITFDRV
MEJ-IPK   ISGDDIVPYLANELKADL-ILYATDVDGVLIDNKPIKRI---DKNNIYKIL-NYLSGSN
           *. * : : : : : : : : : : : : : : : * . . .

                                D208 T210 K216
STW-FomA  EWDATGAMHTKLDALVTCARR-GAECFIMRGDPGSDLE-FLTAPFSSWPAHVRSTRITTT
THA-IPK   QNDVTGGIGKKFESMVKMKSSVKNGVYILINGNHPERIGDIGKESFI-----GTVIR--
MEJ-IPK   SIDVTGGMKYKIEIRK----NKCRGFVFNNGKANNIYKALLGEVE-----GTEIDFS
           . *. ** : : * : : . : : : : : : : : : . . * *

```

**Figure S2.** Sequence alignment of AAK enzymes FomA and IPK using the Clustal Omega web server. Key residues in FomA and their corresponding residues in IPK are highlighted in red. Species names are abbreviated as follows: STW, *Streptomyces wedmorensis* (STW-FomA: BAA32493.1); THA, *Thermoplasma acidophilum* (THA-IPK: CAC11251.1); MEJ, *Methanocaldococcus jannaschii* (MEJ-IPK: AAB98024.1). The glycine-rich loop consisting residues 16-24 is underlined by red line.

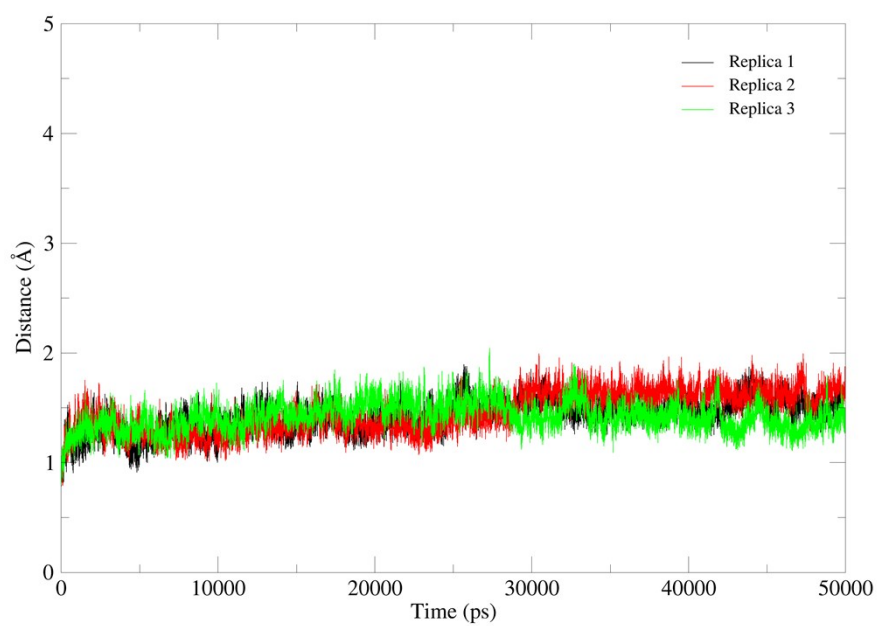

(A)

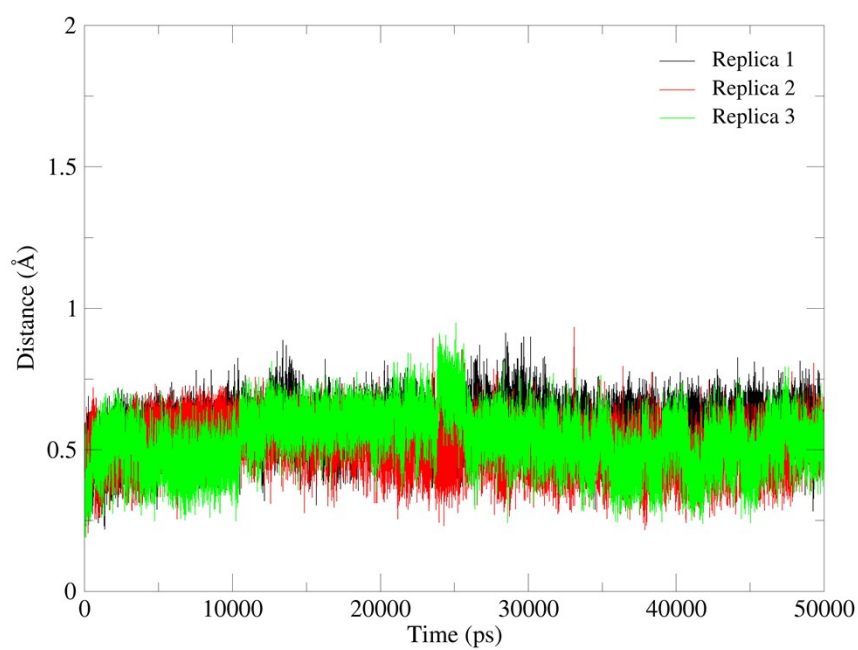

(B)

**Figure S3.** (A) RMSD values for C $\alpha$  carbon of the backbone of ATP-FM-Mg<sup>2+</sup>-FomA complex (B) RMSD values for heavy atoms of ATP in the ATP-FM-Mg<sup>2+</sup>-FomA complex (plotted based on the last 50 ns trajectory).

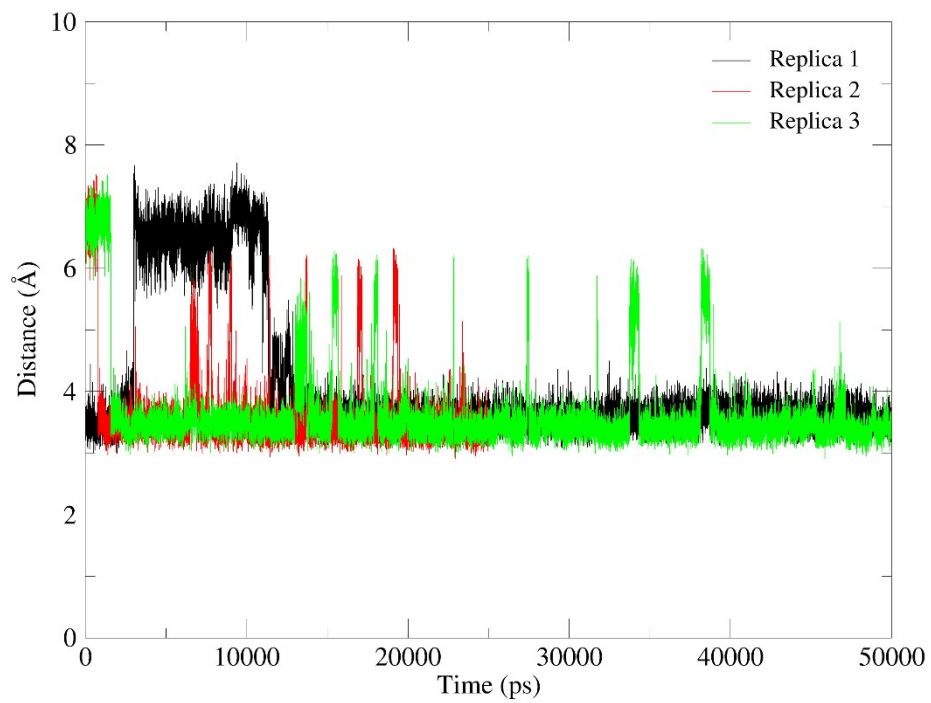

(A)

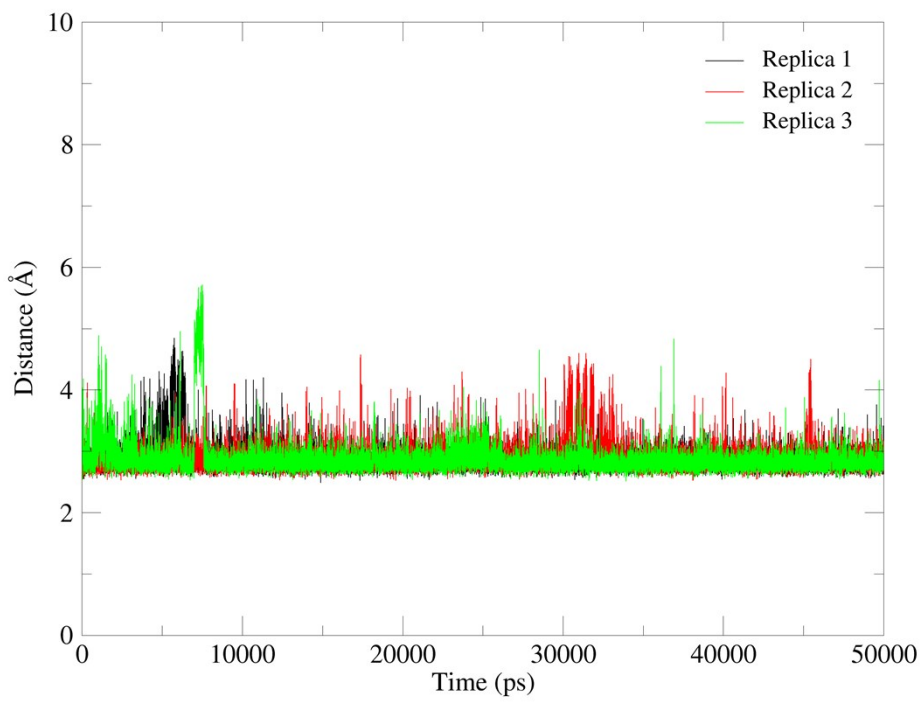



(B)

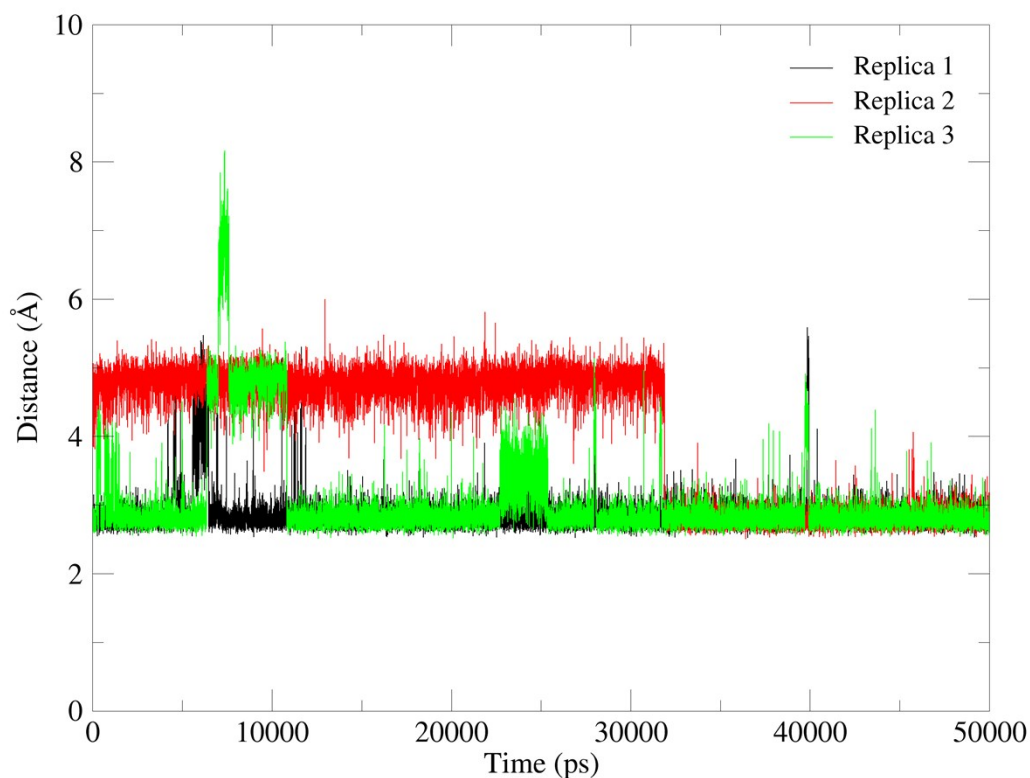

(C)

**Figure S4.** (A) Distance between the  $\gamma$ -phosphate of ATP and the phosphate group of fosfomycin from 3 replicas of 100-ns MD simulations of the ATP-FM-Mg<sup>2+</sup>-FomA complex (plotted based on the last 50 ns trajectory) (B). Distance between the  $\alpha$ -phosphate of ATP and Lys18 from 3 replicas of 100-ns MD simulations of the ATP-FM-Mg<sup>2+</sup>-FomA complex (plotted based on the last 50 ns trajectory) (C). Distance between Lys18 and Asp208 from 3 replicas of 100-ns MD simulations of the ATP-FM-Mg<sup>2+</sup>-FomA complex (plotted based on the last 50 ns trajectory).

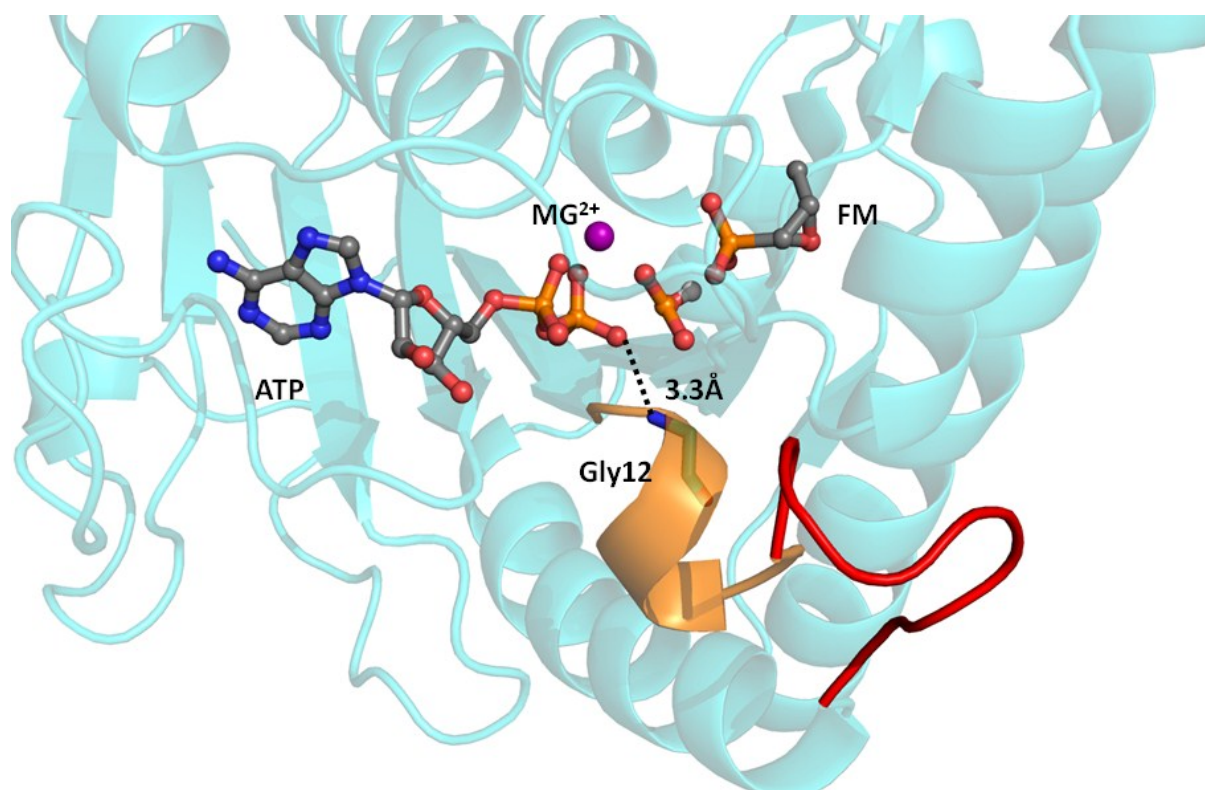

**Figure S5.** The QM/MM optimized structure of the transition state shows that Gly12 on the  $\gamma$ -turn (orange) connecting to the flexible glycine rich loop (red) forms a H-bond with the  $\beta$ -,  $\gamma$ -bridging oxygen.

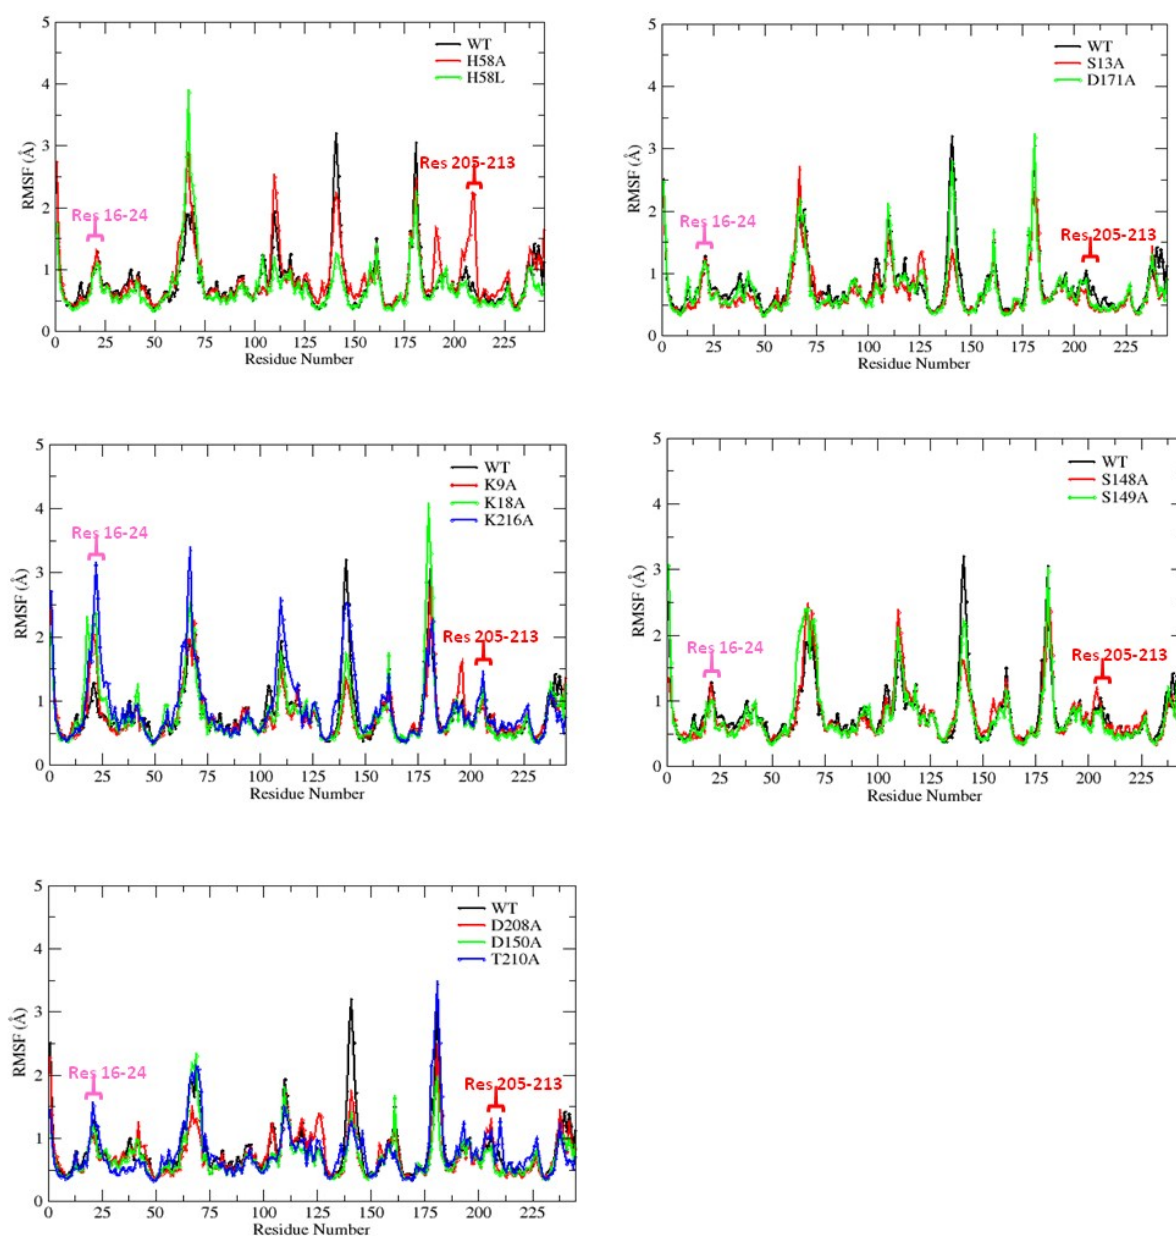

**Figure S6.** RMSF plots of the variants in comparison with the WT FomA. The glycine-rich loop comprising residues 16-24 is marked in pink and the loop connecting  $\alpha$ -helix 6 and  $\alpha$ -helix 7 is marked in red.

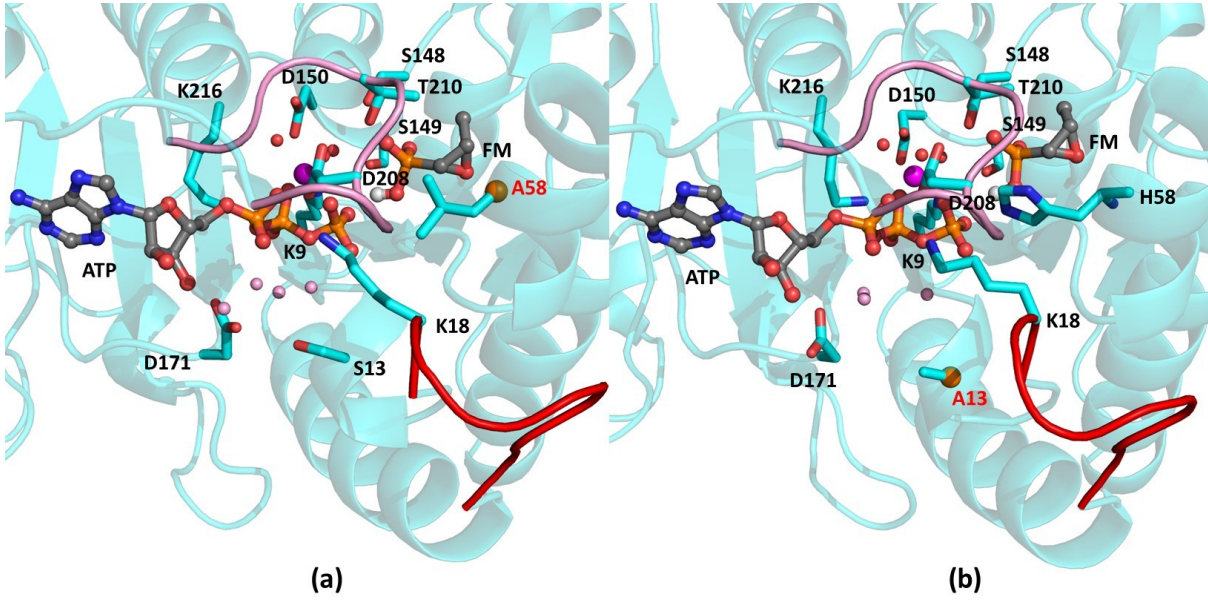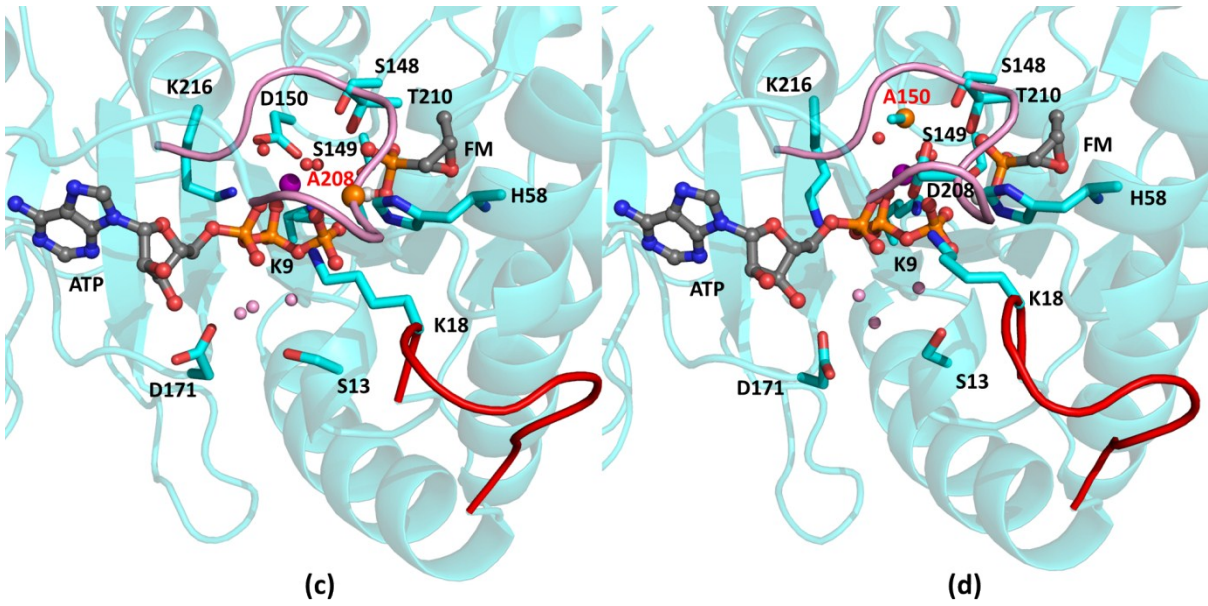

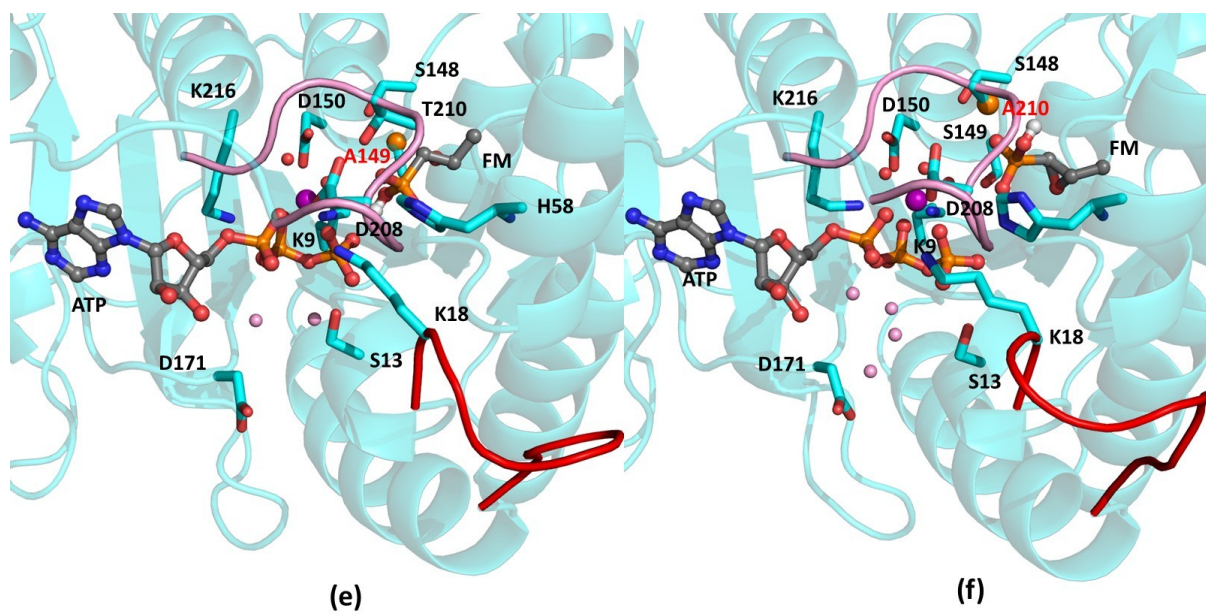

**Figure S7.** Representative structures of FomA mutants from MD simulations (a) H58L (b) S13A (c) D208A (d) D150A (e) S149A (f) T210A.
